# Supplementary material for: Maintaining nanoimprinting-induced face-on alignment in poly(3-hexylthiophene) nanopillars after thermal annealing
Source: Royal Society of Chemistry journal article supplement (doi:10.1039/c7ra09667d), 2017-01-01
Supplement: c7ra09667d1.pdf [file c7ra09667d1.pdf]

## **Electronic Supplementary Information (ESI)**

### **The maintaining of nanoimprinting-induced face-on alignment in poly(3-hexylthiophene) nanopillars after thermal annealing**

Chao Wang,<sup>a,b</sup> Kaixuan Wang,<sup>a,b</sup> Menxiang Qian,<sup>a,b</sup> Haiming Yu,<sup>a,b</sup> Guangzhu Ding<sup>a,b,\*</sup> and Jieping Liu<sup>a,b</sup>

<sup>a</sup>College of Chemistry and Materials Science, Huaibei Normal University, Huaibei 235000, China

<sup>b</sup>Anhui Key Laboratory of Energetic Materials, Anhui, 235000, China

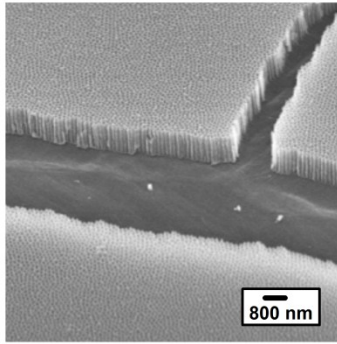

**Fig. S1** The cross-sectional SEM image of the AAO template.

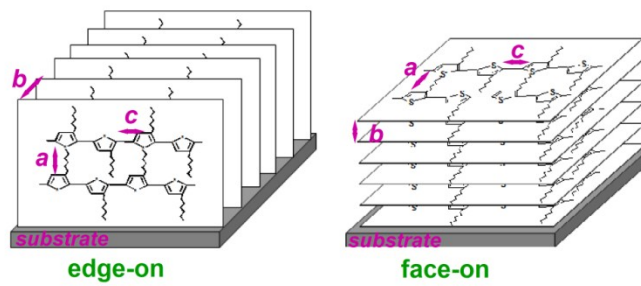

**Fig. S2** Schematic alignment of edge-on and face-on molecular orientation of P3HT molecule chains.

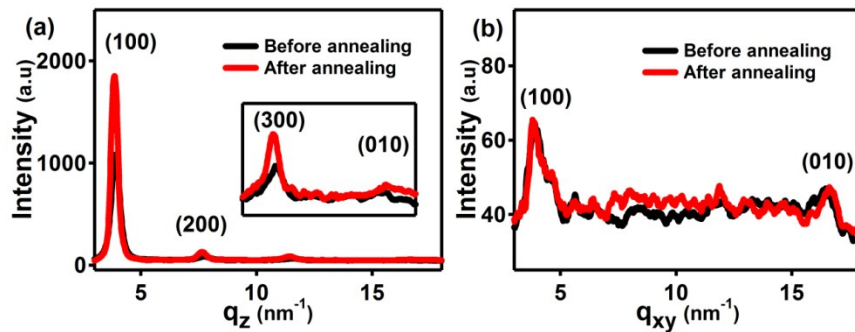

**Fig. S3** The one dimensional (1D) GIWAXD intensity profiles integrated along the  $q_z$  direction (a) and along the  $q_{xy}$  direction (b) for P3HT nanopillar film before and after annealing. The integrated data are collected from the corresponding 2D images as shown in Figures 2 and 3.

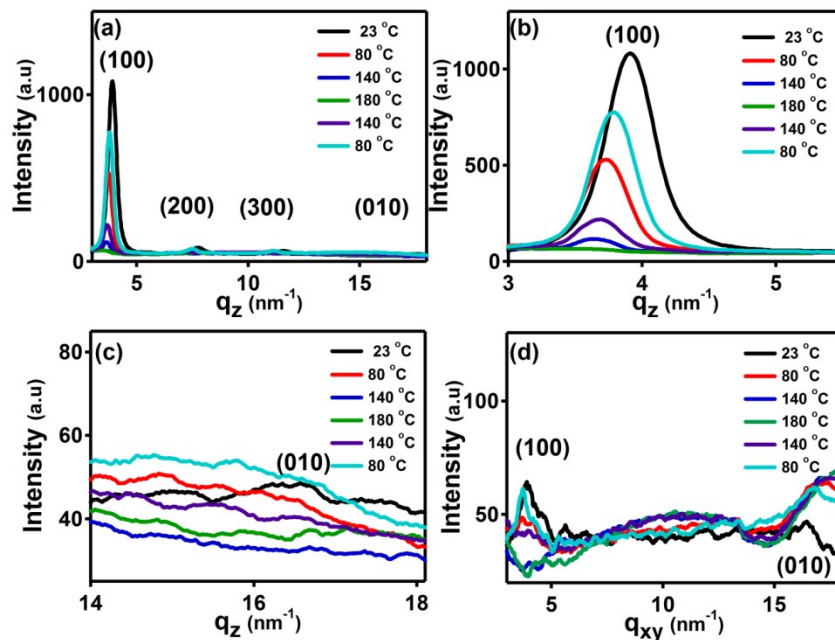

**Fig. S4** The 1D GIWAXD intensity profiles of P3HT nanopillar film integrated along the  $q_z$  direction (a-c) and along the  $q_{xy}$  direction (d). The integrated data are obtained from the 2D patterns shown in Figure 4. The integrated figures (b) and (c) show magnified details of the (100) and (010) peaks along the  $q_z$  direction.

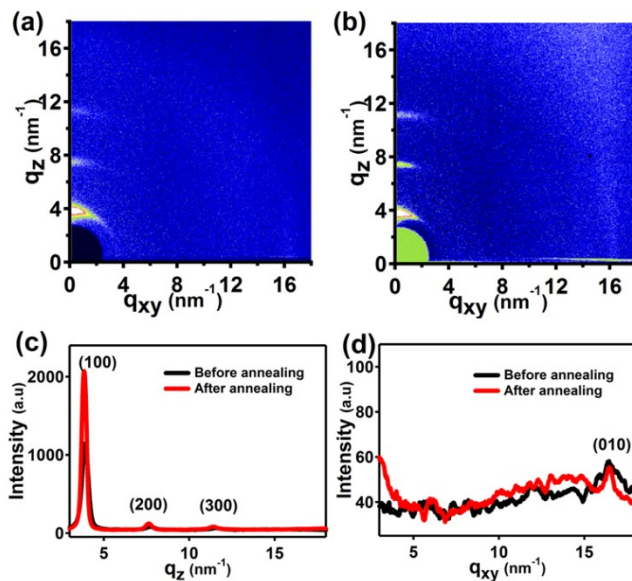

**Fig. S5** The 2D GIWAXD images of unpatterned P3HT film before (a) and after (b) thermal annealing. 1D GIWAXD intensity profiles of unpatterned polymer film integrated along the  $q_z$  direction (c) and along the  $q_{xy}$  direction (d). The integrated data in (c) and (d) are collected from the corresponding 2D images as shown in (a) and (b).
